# Supplementary material
Source: ML conference proceedings conference paper supplement (https://proceedings.mlr.press/v48/zhaoa16.html)
Supplement: Supplementary file 1 [file zhaoa16-supp.pdf]

## A. Synthetic Experiments

In this section we provide synthetic experiments to demonstrate that (11) is a good approximation to (7) when the variational Dirichlet posterior has a single mode, which is easily achieved in practice when  $\beta > 1$ . We use the SPN shown in Fig. 3 as a

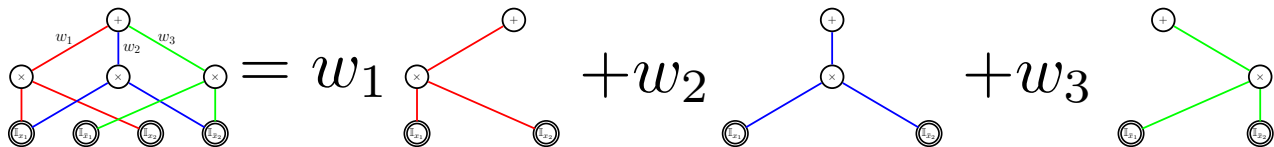

Figure 3. A simple SPN over two binary variables  $X_1$  and  $X_2$  that can be decomposed into three components.

synthetic example where each leaf univariate distribution is fixed to be an indicator variable, i.e., a point mass distribution. The joint distribution is given by  $p(\mathbf{x}|\mathbf{w}) = w_1 \mathbb{I}_{x_1} \mathbb{I}_{\bar{x}_2} + w_2 \mathbb{I}_{\bar{x}_1} \mathbb{I}_{\bar{x}_2} + w_3 \mathbb{I}_{\bar{x}_1} \mathbb{I}_{x_2}$  with  $w_1 + w_2 + w_3 = 1$ .

Since the KL divergence  $\mathbb{KL}(q(\mathbf{w}|\beta) \parallel p(\mathbf{w}|\boldsymbol{\alpha}))$  is the same in both (7) and (11), to show the difference, we only need to compare  $\mathbb{E}_{q(\mathbf{w}|\beta)}[\log p(\mathbf{x}|\mathbf{w})]$  and  $\log p(\mathbf{x}|\exp(\mathbb{E}_{q'(\mathbf{w}'|\beta)}[\mathbf{w}']))$ . Recall that we have  $\mathbf{w}' = \log \mathbf{w}$  by definition.

We use a data set  $\{(1, 1), (1, 0), (0, 0)\}$  that contains all the instances of  $\mathbf{x}$  in the support of the distribution. To show the approximation accuracy of (11), we test with both symmetric and skewed Dirichlet distributions  $q(\mathbf{w}|\beta)$ . To be more specific, we use  $\beta_1 = [1.0, 1.0, 1.0]^T$  and  $\beta_2 = [10.0, 1.0, 1.0]^T$  as the hyperparameters of the variational posterior and compute both  $\mathbb{E}_{q(\mathbf{w}|\beta)}[\log p(\mathbf{x}|\mathbf{w})]$  and  $\log p(\mathbf{x}|\exp(\mathbb{E}_{q'(\mathbf{w}'|\beta)}[\mathbf{w}']))$  as a function of  $\beta$ . To demonstrate the quality of the approximation and the scale factor of the Dirichlet, for each  $\beta$ , we fixed the shape of the Dirichlet distribution but gradually increase its scale factor, i.e.,  $\beta' = s\beta$ , where  $s$  ranges from 1 to 100.  $\mathbb{E}_{q(\mathbf{w}|\beta)}[\log p(\mathbf{x}|\mathbf{w})]$  does not admit a closed form computation, hence we sample 10000 weight vectors from  $q(\mathbf{w}|\beta)$  and use the empirical average to approximate the expectation.

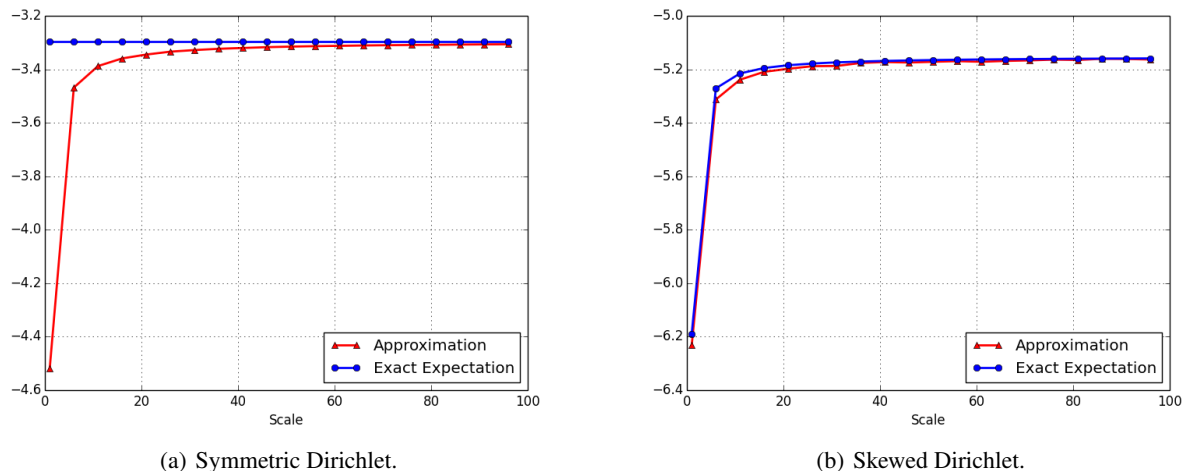

Figure 4. Synthetic experiments to compare the approximation of  $\log p(\mathbf{x}|\exp(\mathbb{E}_{q'(\mathbf{w}'|\beta)}[\mathbf{w}']))$  (red, lower bound) to  $\mathbb{E}_{q(\mathbf{w}|\beta)}[\log p(\mathbf{x}|\mathbf{w})]$  (blue, exact expectation). Fig. 4(a) corresponds to symmetric  $\beta_1 = [1.0, 1.0, 1.0]^T$  and Fig. 4(b) corresponds to skewed  $\beta = [10.0, 1.0, 1.0]^T$ .

It can be observed from Fig. 4 that the approximation is actually very close to the true exact expectation, especially when the Dirichlet distribution has a high concentration around its single mode, which corresponds to a large scale factor. This holds no matter whether the variational posterior is symmetric or not.
